# Supplementary material for: Hierarchical structure and modules in the Escherichia coli transcriptional regulatory network revealed by a new top-down approach
Source: Springer Nature journal article supplement (doi:10.1186/1471-2105-5-199), 2004-12-16

**A**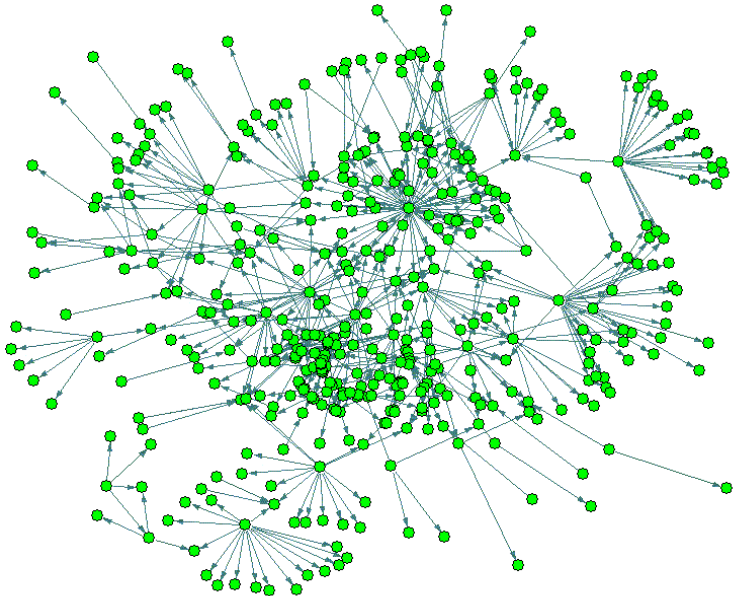**B**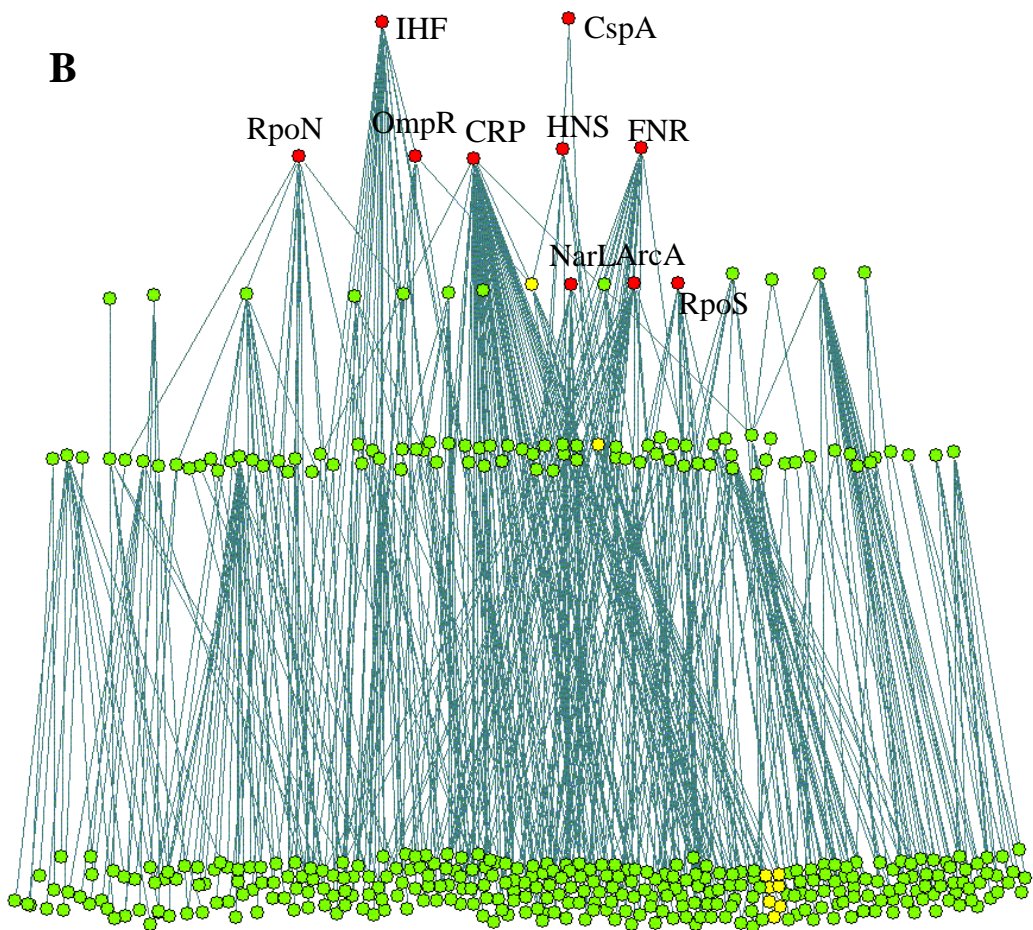

Supplement: 12859_2004_315_MOESM2_ESM.pdf [file 12859_2004_315_MOESM2_ESM.pdf]
